# Supplementary material for: Methionine-driven methylation modification overcomes plasmid-mediated high-level tigecycline resistance
Source: PubMed Central journal article supplement — Nat Commun. 2025 Jan 6;16:417. doi: 10.1038/s41467-024-55791-w (PMC11704046; doi:10.1038/s41467-024-55791-w), 2025-01-06
Supplement: 41467_2024_55791_MOESM3_ESM.pdf [file 41467_2024_55791_MOESM3_ESM.pdf]

## Reporting Summary

Nature Portfolio wishes to improve the reproducibility of the work that we publish. This form provides structure for consistency and transparency in reporting. For further information on Nature Portfolio policies, see our [Editorial Policies](#) and the [Editorial Policy Checklist](#).

### Statistics

For all statistical analyses, confirm that the following items are present in the figure legend, table legend, main text, or Methods section.

- | n/a                                 | Confirmed                                                                                                                                                                                                                                                                                      |
|-------------------------------------|------------------------------------------------------------------------------------------------------------------------------------------------------------------------------------------------------------------------------------------------------------------------------------------------|
| <input type="checkbox"/>            | <input checked="" type="checkbox"/> The exact sample size ( $n$ ) for each experimental group/condition, given as a discrete number and unit of measurement                                                                                                                                    |
| <input type="checkbox"/>            | <input checked="" type="checkbox"/> A statement on whether measurements were taken from distinct samples or whether the same sample was measured repeatedly                                                                                                                                    |
| <input type="checkbox"/>            | <input checked="" type="checkbox"/> The statistical test(s) used AND whether they are one- or two-sided<br><i>Only common tests should be described solely by name; describe more complex techniques in the Methods section.</i>                                                               |
| <input type="checkbox"/>            | <input checked="" type="checkbox"/> A description of all covariates tested                                                                                                                                                                                                                     |
| <input type="checkbox"/>            | <input checked="" type="checkbox"/> A description of any assumptions or corrections, such as tests of normality and adjustment for multiple comparisons                                                                                                                                        |
| <input type="checkbox"/>            | <input checked="" type="checkbox"/> A full description of the statistical parameters including central tendency (e.g. means) or other basic estimates (e.g. regression coefficient) AND variation (e.g. standard deviation) or associated estimates of uncertainty (e.g. confidence intervals) |
| <input type="checkbox"/>            | <input checked="" type="checkbox"/> For null hypothesis testing, the test statistic (e.g. $F$ , $t$ , $r$ ) with confidence intervals, effect sizes, degrees of freedom and $P$ value noted<br><i>Give <math>P</math> values as exact values whenever suitable.</i>                            |
| <input checked="" type="checkbox"/> | <input type="checkbox"/> For Bayesian analysis, information on the choice of priors and Markov chain Monte Carlo settings                                                                                                                                                                      |
| <input checked="" type="checkbox"/> | <input type="checkbox"/> For hierarchical and complex designs, identification of the appropriate level for tests and full reporting of outcomes                                                                                                                                                |
| <input type="checkbox"/>            | <input checked="" type="checkbox"/> Estimates of effect sizes (e.g. Cohen's $d$ , Pearson's $r$ ), indicating how they were calculated                                                                                                                                                         |

*Our web collection on [statistics for biologists](#) contains articles on many of the points above.*

### Software and code

Policy information about [availability of computer code](#)

Data collection Fluorescence intensity, luminescence and absorbance data were collected using Infinite E Plex Microplate reader (Tecan)

Data analysis GraphPad Prism versions 9.1.1 was used to perform statistical analysis, as indicated in methods  
Microsoft Excel 2019, Majorbio and Omic Share platform were used for data analysis

For manuscripts utilizing custom algorithms or software that are central to the research but not yet described in published literature, software must be made available to editors and reviewers. We strongly encourage code deposition in a community repository (e.g. GitHub). See the Nature Portfolio [guidelines for submitting code & software](#) for further information.

### Data

Policy information about [availability of data](#)

All manuscripts must include a [data availability statement](#). This statement should provide the following information, where applicable:

- Accession codes, unique identifiers, or web links for publicly available datasets
- A description of any restrictions on data availability
- For clinical datasets or third party data, please ensure that the statement adheres to our [policy](#)

Metabolomics data have been deposited in Mendeley Data (<https://doi.org/10.17632/p6fjgvb2yv.1>). RNA-sequencing data have been deposited in the National Center for Biotechnology Information (NCBI) Sequence Read Archive (SRA) database (PRJNA759745).

## Research involving human participants, their data, or biological material

Policy information about studies with [human participants or human data](#). See also policy information about [sex, gender \(identity/presentation\), and sexual orientation](#) and [race, ethnicity and racism](#).

|                                                                    |                                      |
|--------------------------------------------------------------------|--------------------------------------|
| Reporting on sex and gender                                        | No human participants were involved. |
| Reporting on race, ethnicity, or other socially relevant groupings | No human participants were involved. |
| Population characteristics                                         | No human participants were involved. |
| Recruitment                                                        | No human participants were involved. |
| Ethics oversight                                                   | No human participants were involved. |

Note that full information on the approval of the study protocol must also be provided in the manuscript.

## Field-specific reporting

Please select the one below that is the best fit for your research. If you are not sure, read the appropriate sections before making your selection.

Life sciences  Behavioural & social sciences  Ecological, evolutionary & environmental sciences

For a reference copy of the document with all sections, see [nature.com/documents/nr-reporting-summary-flat.pdf](https://www.nature.com/documents/nr-reporting-summary-flat.pdf)

## Life sciences study design

All studies must disclose on these points even when the disclosure is negative.

|                 |                                                                                                                                               |
|-----------------|-----------------------------------------------------------------------------------------------------------------------------------------------|
| Sample size     | No sample size calculation was performed. For mouse studies, $n \geq 6$ was used to show statistical significance and replication of results. |
| Data exclusions | No exclusions.                                                                                                                                |
| Replication     | Biological replicates were performed for all experiments and confirmed reproducible.                                                          |
| Randomization   | For mouse studies, 6~8-week-old female BALB/c mice were grouped randomly.                                                                     |
| Blinding        | No blinding was required because all measurements are not subject to investigator's bias or ambiguity.                                        |

## Reporting for specific materials, systems and methods

We require information from authors about some types of materials, experimental systems and methods used in many studies. Here, indicate whether each material, system or method listed is relevant to your study. If you are not sure if a list item applies to your research, read the appropriate section before selecting a response.

### Materials & experimental systems

| n/a                                 | Involvement in the study                                        |
|-------------------------------------|-----------------------------------------------------------------|
| <input checked="" type="checkbox"/> | <input type="checkbox"/> Antibodies                             |
| <input type="checkbox"/>            | <input checked="" type="checkbox"/> Eukaryotic cell lines       |
| <input checked="" type="checkbox"/> | <input type="checkbox"/> Palaeontology and archaeology          |
| <input type="checkbox"/>            | <input checked="" type="checkbox"/> Animals and other organisms |
| <input checked="" type="checkbox"/> | <input type="checkbox"/> Clinical data                          |
| <input checked="" type="checkbox"/> | <input type="checkbox"/> Dual use research of concern           |
| <input checked="" type="checkbox"/> | <input type="checkbox"/> Plants                                 |

### Methods

| n/a                                 | Involvement in the study                           |
|-------------------------------------|----------------------------------------------------|
| <input checked="" type="checkbox"/> | <input type="checkbox"/> ChIP-seq                  |
| <input type="checkbox"/>            | <input checked="" type="checkbox"/> Flow cytometry |
| <input checked="" type="checkbox"/> | <input type="checkbox"/> MRI-based neuroimaging    |

## Eukaryotic cell lines

Policy information about [cell lines and Sex and Gender in Research](#)

|                                                                      |                                                                                                   |
|----------------------------------------------------------------------|---------------------------------------------------------------------------------------------------|
| Cell line source(s)                                                  | RAW264.7 cells are derived from tumors induced by Abelson murine leukemia virus.                  |
| Authentication                                                       | RAW264.7 cell line was purchased from Zhong Qiao Xin Zhou Biotechnology (ZQ0098, Shanghai, China) |
| Mycoplasma contamination                                             | No mycoplasma contamination.                                                                      |
| Commonly misidentified lines<br>(See <a href="#">ICLAC</a> register) | No misidentified lines used.                                                                      |

## Animals and other research organisms

Policy information about [studies involving animals](#); [ARRIVE guidelines](#) recommended for reporting animal research, and [Sex and Gender in Research](#)

|                         |                                                                                                                                         |
|-------------------------|-----------------------------------------------------------------------------------------------------------------------------------------|
| Laboratory animals      | 6~8-week-old female BALB/c mice were used for all experiments.                                                                          |
| Wild animals            | No wild animals were used.                                                                                                              |
| Reporting on sex        | The finds applied not only one sex.                                                                                                     |
| Field-collected samples | No field samples were used.                                                                                                             |
| Ethics oversight        | The animal use procedures were approved by Jiangsu Administrative Committee for Laboratory Animals (Permission number: SYXK-2022-0044). |

Note that full information on the approval of the study protocol must also be provided in the manuscript.

## Plants

|                       |                      |
|-----------------------|----------------------|
| Seed stocks           | No plants were used. |
| Novel plant genotypes | No plants were used. |
| Authentication        | No plants were used. |

## Flow Cytometry

### Plots

Confirm that:

- The axis labels state the marker and fluorochrome used (e.g. CD4-FITC).
- The axis scales are clearly visible. Include numbers along axes only for bottom left plot of group (a 'group' is an analysis of identical markers).
- All plots are contour plots with outliers or pseudocolor plots.
- A numerical value for number of cells or percentage (with statistics) is provided.

### Methodology

|                           |                                                                                                                                                                                                         |
|---------------------------|---------------------------------------------------------------------------------------------------------------------------------------------------------------------------------------------------------|
| Sample preparation        | The resuspended E. coli B3-1 (tet(X4)) in M9 medium were co-incubated with SYTO 9 (1.67 mM) and PI (10 mM) dyes for 15 min and then 10,000 ungated events were measured using CytExpert Flow Cytometer. |
| Instrument                | CytExpert Flow Cytometer (CytoFLEX S, Beckman, USA)                                                                                                                                                     |
| Software                  | FlowJo 10.8.1                                                                                                                                                                                           |
| Cell population abundance | 10,000 ungated events were set as a standard to normalized the bacterial cells count.                                                                                                                   |
| Gating strategy           | The cells in the control population were gated and the cells in the population were further analyzed, FITC-A indicates live cells                                                                       |

and ECD-A indicates dead cells.

Tick this box to confirm that a figure exemplifying the gating strategy is provided in the Supplementary Information.
